# Supplementary material for: Direct analysis of tree rings using laser ablation-ICP-MS and quantitative evaluation of Zn and Cu using filter paper as a solid support for calibration
Source: Royal Society of Chemistry journal article supplement (doi:10.1039/d1ja00414j), 2022-01-01
Supplement: d1ja00414j1.pdf [file d1ja00414j1.pdf]

Supplementary material

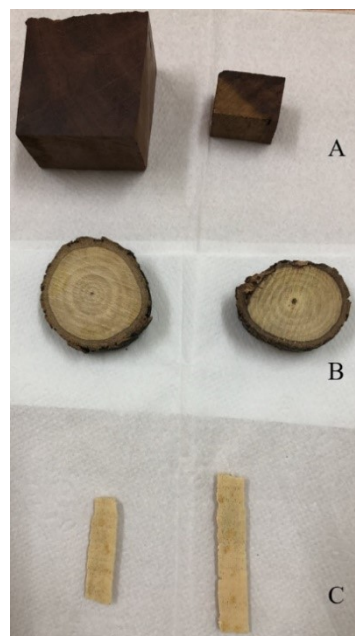

**Figure SM1:** Samples of *Hymenaea courbaril* (A), *Tipuana tipu* (B), *Cavanillesia arboraceae* donated by the xylotheque of the Institute of Biosciences – USP.

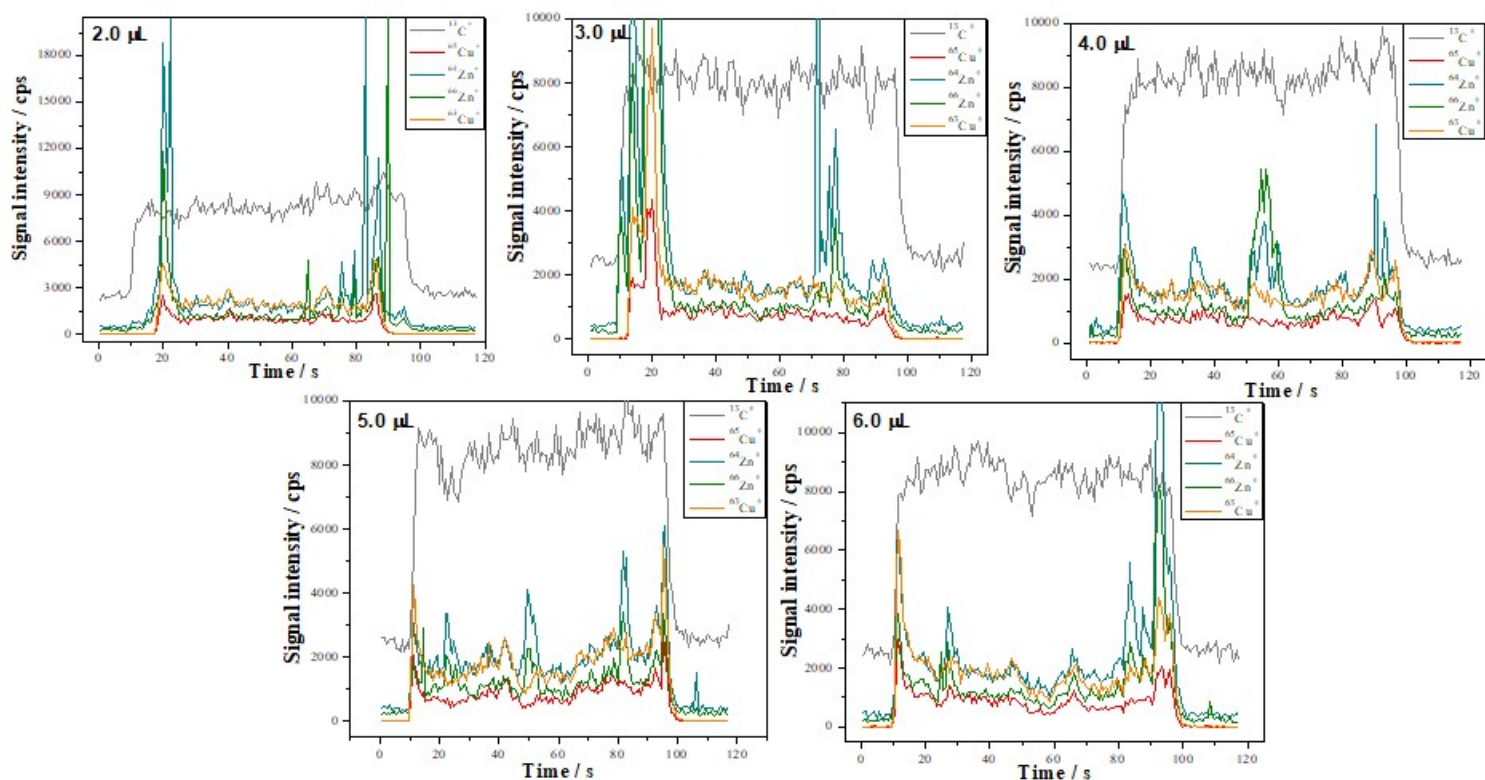

**Figure SM2:** Signal intensity (cps) of Cu, Zn and C ( $^{13}\text{C}^+$ ;  $^{65}\text{Cu}^+$ ;  $^{64}\text{Zn}^+$ ;  $^{66}\text{Zn}^+$ ,  $^{63}\text{Cu}^+$ ) monitored isotopes along the whole diameter of the calibration support, for different volumes of standard solution addition over the 0.20 µm pore size diameter filter paper disk. Data acquired with LA-ICP-MS and final mass fraction of Cu and Zn in the filter paper disks was 10.0 µg g<sup>-1</sup>.

**Table SM1:** Instrumental conditions established for LA-ICP-MS analysis of tree-rings.

| <b>Instrumental Parameters</b>                 | <b>Elan DRC-e</b>                                                                                                                                            |
|------------------------------------------------|--------------------------------------------------------------------------------------------------------------------------------------------------------------|
| Radiofrequency Power (W)                       | 1300                                                                                                                                                         |
| Carrier gas flow rate (L min <sup>-1</sup> )   | 1.2                                                                                                                                                          |
| Auxiliary gas flow rate (L min <sup>-1</sup> ) | 1.6                                                                                                                                                          |
| <b>Data acquisition parameters</b>             | -                                                                                                                                                            |
| Analysis mode                                  | Peak hopping                                                                                                                                                 |
| Detector mode                                  | Pulsed                                                                                                                                                       |
| Sweeps                                         | 5                                                                                                                                                            |
| Dwell time (ms)                                | 20                                                                                                                                                           |
| Integration time (ms)                          | 100                                                                                                                                                          |
| Monitored ions                                 | <sup>13</sup> C <sup>+</sup> , <sup>63</sup> Cu <sup>+</sup> , <sup>65</sup> Cu <sup>+</sup> , <sup>64</sup> Zn <sup>+</sup> , <sup>66</sup> Zn <sup>+</sup> |
| <b>Laser conditions</b>                        | <b>New Wave UP-213</b>                                                                                                                                       |
| Laser wavelength (nm)                          | 213                                                                                                                                                          |
| Laser intensity (J cm <sup>-2</sup> )          | 0.60                                                                                                                                                         |
| Repetition rate (Hz)                           | 20                                                                                                                                                           |
| Spot size diameter (μm)                        | 110                                                                                                                                                          |
| Scan speed (μm s <sup>-1</sup> )               | 60                                                                                                                                                           |

**Table SM2:** Instrumental conditions established for ICP-MS analysis decomposed tree samples  
and NIST 1575a.

| <b>Instrumental parameters</b>                    |                                                                                                                               |
|---------------------------------------------------|-------------------------------------------------------------------------------------------------------------------------------|
| Nebulizer chamber                                 | Cyclonic                                                                                                                      |
| Nebulizer                                         | Meinhard®                                                                                                                     |
| Radiofrequency power (W)                          | 1400                                                                                                                          |
| Nebulizer gas flow rate (L min <sup>-1</sup> )    | 0.9041                                                                                                                        |
| Auxiliary gas flow rate (L min <sup>-1</sup> )    | 0.8                                                                                                                           |
| Spray Chamber Temperature (°C)                    | 2.68                                                                                                                          |
| <b>Acquisition parameters</b>                     |                                                                                                                               |
| Scan mode                                         | <i>Peak hopping</i>                                                                                                           |
| Sweeps                                            | 10                                                                                                                            |
| Dwell time (ms)                                   | 100                                                                                                                           |
| Integration time (ms)                             | 1000                                                                                                                          |
| Replicates                                        | 3                                                                                                                             |
| Monitored ions                                    | <sup>63</sup> Cu <sup>+</sup> , <sup>65</sup> Cu <sup>+</sup> , <sup>64</sup> Zn <sup>+</sup> , <sup>66</sup> Zn <sup>+</sup> |
| <sup>64</sup> Zn <sup>+</sup> correction equation | -0,035297 x <sup>60</sup> Ni <sup>+</sup>                                                                                     |

**Table SM3:** Mass fraction values for the monitored ions, determined in the CRM pellets using LA-ICP-MS, as well as the percentage of accuracy in comparison with the certified results, and the relative standard deviation for the measurements. Results obtained from external calibration using qualitative and 0.20 µm pore size diameter quantitative filter paper as calibration solid support. Results were obtained with data normalization using <sup>13</sup>C as internal standard.

| Monitored<br><br>ion                                         | Qualitative filter paper |            |                 |            |            |            |                 |            | Quantitative filter paper |            |                 |            |            |            |                 |            |
|--------------------------------------------------------------|--------------------------|------------|-----------------|------------|------------|------------|-----------------|------------|---------------------------|------------|-----------------|------------|------------|------------|-----------------|------------|
|                                                              | NIST 1573a               |            |                 |            | NIST 1575a |            |                 |            | NIST 1573a                |            |                 |            | NIST 1575a |            |                 |            |
|                                                              | Certified                | Determined | Accuracy<br>(%) | RSD<br>(%) | Certified  | Determined | Accuracy<br>(%) | RSD<br>(%) | Certified                 | Determined | Accuracy<br>(%) | RSD<br>(%) | Certified  | Determined | Accuracy<br>(%) | RSD<br>(%) |
| <sup>65</sup> Cu <sup>+</sup> / <sup>13</sup> C <sup>+</sup> | 4.70 ± 0.14              | 3.4 ± 0.6  | 71              | 18         | 2.8 ± 0.2  | 1.4 ± 0.1  | 49              | 6          | 4.7 ± 0.1                 | 3.9 ± 0.7  | 83              | 17         | 2.8 ± 0.2  | 1.7 ± 0.1  | 61              | 5          |
| <sup>63</sup> Cu <sup>+</sup> / <sup>13</sup> C <sup>+</sup> | 4.70 ± 0.14              | 3.4 ± 0.5  | 72              | 15         | 2.8 ± 0.2  | 1.4 ± 0.1  | 51              | 6          | 4.7 ± 0.1                 | 3.9 ± 0.6  | 84              | 14         | 2.8 ± 0.2  | 1.8 ± 0.1  | 63              | 5          |
| <sup>64</sup> Zn <sup>+</sup> / <sup>13</sup> C <sup>+</sup> | 30.94 ± 0.55             | 17 ± 5     | 54              | 31         | 38 ± 2     | 26 ± 2     | 67              | 6          | 30.94 ±<br>0.55           | 20 ± 5     | 66              | 27         | 38 ± 2     | 28 ± 2     | 74              | 6          |
| <sup>66</sup> Zn <sup>+</sup> / <sup>13</sup> C <sup>+</sup> | 30.94 ± 0.55             | 17 ± 8     | 53              | 47         | 38 ± 2     | 18 ± 2     | 46              | 11         | 30.94 ±<br>0.55           | 20 ± 8     | 65              | 40         | 38 ± 2     | 21 ± 2     | 55              | 10         |

**Table SM4:** Results of the accuracy and precision experiments for the solution based-ICP-MS measurements, with standard addition calibration method, for the quantification of Cu and Zn in the decomposed tree samples. Experiment performed with NIST 1575a SRM.

| Monitored Ion      | Certified     | Determined      | Accuracy (%) | RSD (%) |
|--------------------|---------------|-----------------|--------------|---------|
| $^{65}\text{Cu}^+$ | $2.8 \pm 0.2$ | $2.67 \pm 0.02$ | 95           | 1       |
| $^{63}\text{Cu}^+$ | $2.8 \pm 0.2$ | $2.66 \pm 0.07$ | 95           | 3       |
| $^{64}\text{Zn}^+$ | $38 \pm 2$    | $33 \pm 1$      | 87           | 3       |
| $^{66}\text{Zn}^+$ | $38 \pm 2$    | $32 \pm 1$      | 85           | 3       |
